# Supplementary material for: Tailoring Mesoporous Titania Features by Ultrasound-Assisted Sol-Gel Technique: Effect of Surfactant/Titania Precursor Weight Ratio
Source: MDPI journal article supplement (doi:10.3390/nano11051263), 2021-05-11
Supplement: s1 [file s1]

## Supplementary Materials

### Tailoring Mesoporous Titania Features by Ultrasound-Assisted Sol-Gel Technique: Effect of Surfactant/Titania Precursor Weight Ratio

Elvira Mahu, Cristina Giorgiana Coromelci, Doina Lutic, Iuliean Vasile Asaftei, Liviu Sacarescu, Valeria Harabagiu and Maria Ignat

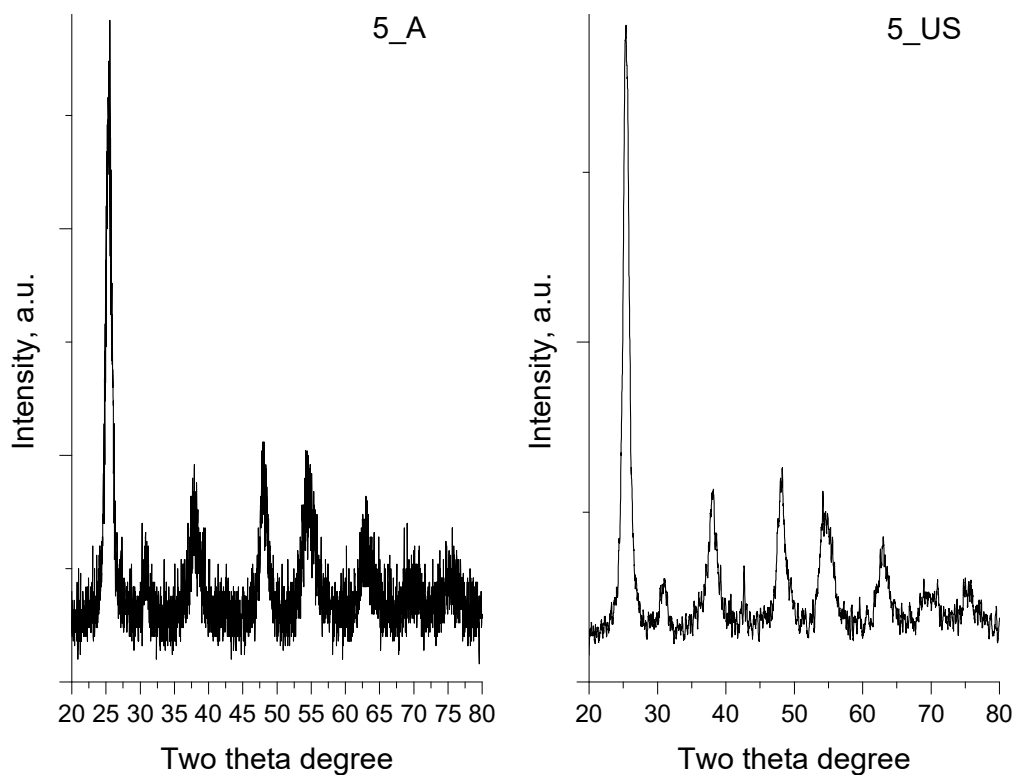

**Figure S1.** XRD patterns of titania samples prepared using the molar ratio of reactants TTIP:F-127:H<sub>2</sub>O:Iso-C<sub>3</sub>H<sub>7</sub>OH =  $4.9 \times 10^{-2}$ : $3.3 \times 10^{-4}$ :2.3:1 (5) by stirring procedure (A) and ultrasound-assisted synthesis (US).

**Table S1.** Structural features of the synthesized porous titania samples derived from XRD patterns.

| Sample | $2\theta_{[101]}$ , ° | $d_{[101]}$ , nm | $a_0$ , nm |
|--------|-----------------------|------------------|------------|
| 5_A    | 25.48                 | 5.589            | 6.454      |
| 10_A   | 25.26                 | 5.863            | 6.770      |
| 15_A   | 25.48                 | 5.499            | 6.350      |
| 5_US   | 25.38                 | 5.376            | 6.208      |
| 10_US  | 25.52                 | 5.135            | 5.929      |
| 15_US  | 25.46                 | 4.252            | 4.910      |

$2\theta_{[101]}$ —diffraction angle of [101] crystallographic plane;  $2\theta_{[004]}$ —diffraction angle of [004] crystallographic plane;  $d_{[101]}$ —interplanar distance calculated from [101] peak;  $a_0$ —unit cell parameter;  $D_{\text{pore(BJH des)}}$ —pore diameter estimated from desorption branch of isotherm.

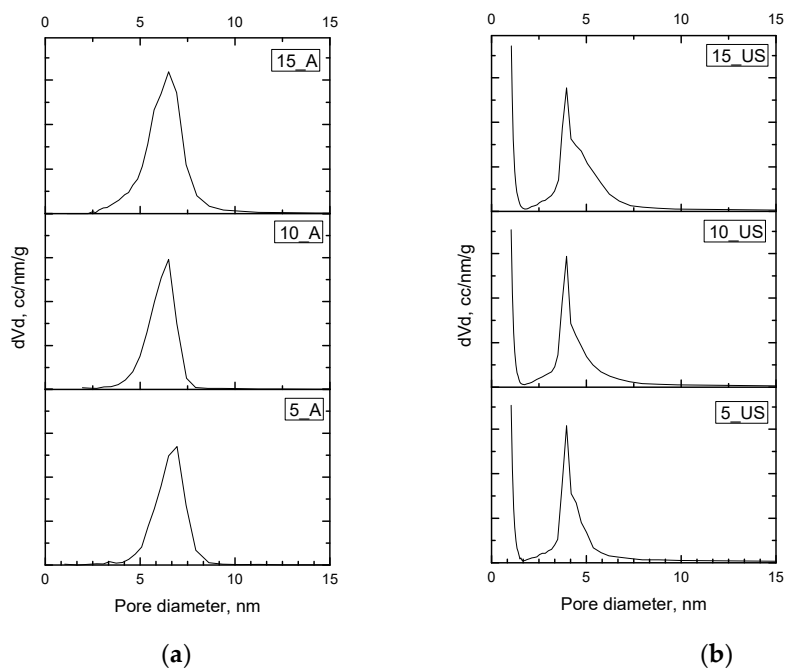

**Figure S2.** Corresponding BJH pore size distributions isotherms for titania samples: (a) A-series; (b) US-series, calculated using desorption branch of isotherm.
